# Supplementary material for: Quantifying the effects of delisting wolves after the first state began lethal management
Source: PeerJ. 2021 Jul 5;9:e11666. doi: 10.7717/peerj.11666 (PMC8265384; doi:10.7717/peerj.11666)
Supplement: Supplemental Information 1 — Official population data for (column a) winters 2016–2017 to 2019–2020, (b) minimum estimate for census population size, (c)maximum estimate, (d) annual growth rate estimated as in main text, and (row 6) 4-year average of the minima, and (row 7) four-year minimum, annual growth rate. [file peerj-09-11666-s001.xlsx]

## Sheet: Sheet 1
Supporting data on annual population size estimate and growth
Winter	Minimum	Maximum	Growth
2016–2017	925	952	0.068
2017–2018	905	944	-0.022
2018–2019	914	978	0.01
2019–2020	1034	1057	0.131
AVERAGE	0.039
MINIMUM			-0.022
Source: https://dnr.wisconsin.gov/topic/WildlifeHabitat/wolf/index.html, accessed 29 March 2021
